# Supplementary material for: Size Effect of Hydrated Lime on the Mechanical Performance of Asphalt Concrete
Source: MDPI journal article supplement (doi:10.3390/ma15103715), 2022-05-22
Supplement: s1 [file s1]

# Size Effect of Hydrated Lime on the Mechanical Performance of Asphalt Concrete

Amjad Albayati <sup>1,\*</sup>, Yu Wang <sup>2</sup> and Jonathan Haynes <sup>2</sup>

<sup>1</sup> Department of Civil Engineering, University of Baghdad, Iraq

<sup>2</sup> School of Science, Engineering & Environment, University of Salford, UK

\* Correspondence: Corresponding author: a.khalil@uobaghdad.edu.iq

**Table S1.** Marshall property measurement.

| VFA<br>% | VMA<br>% | Air Voids<br>% | Density<br>gm/cm <sup>3</sup> | Flow<br>mm | Stability<br>kN | OAC<br>% | HL type | HL Content<br>% |
|----------|----------|----------------|-------------------------------|------------|-----------------|----------|---------|-----------------|
| 71.50    | 14.07    | 4.01           | 2.338                         | 4.0        | 11.67           | 4.9      | Control | 0               |
| 70.34    | 14.06    | 4.17           | 2.328                         | 3.75       | 12.0            | 4.9      | r-HL    | 1               |
| 71.24    | 14.08    | 4.05           | 2.341                         | 3.80       | 12.10           |          | SNHL    |                 |
| 71.56    | 14.10    | 4.01           | 2.339                         | 3.75       | 12.15           |          | NHL     |                 |
| 70.76    | 14.09    | 4.12           | 2.326                         | 3.75       | 12.2            |          | R-HL    |                 |
| 71.91    | 14.06    | 3.95           | 2.346                         | 3.78       | 12.45           | 4.9      | SNHL    | 1.5             |
| 72.75    | 14.02    | 3.82           | 2.347                         | 3.55       | 12.98           |          | NHL     |                 |
| 70.29    | 14.17    | 4.21           | 2.317                         | 4.0        | 13.79           |          | r-HL    |                 |
| 72.36    | 14.04    | 3.88           | 2.336                         | 3.65       | 13.95           |          | SNHL    |                 |
| 73.20    | 14.03    | 3.76           | 2.352                         | 3.40       | 14.20           | 5.0      | NHL     | 2.0             |
| 71.23    | 14.32    | 4.12           | 2.311                         | 4.25       | 11.51           |          | r-HL    |                 |
| 71.69    | 14.27    | 4.04           | 2.320                         | 3.46       | 14.56           |          | SNHL    |                 |
| 72.30    | 14.15    | 3.92           | 2.350                         | 3.35       | 14.87           |          | NHL     |                 |
| 70.29    | 14.54    | 4.32           | 2.296                         | 4.73       | 10.22           | 5.2      | r-HL    | 2.5             |
| 71.39    | 14.40    | 4.12           | 2.310                         | 3.44       | 12.92           |          | SNHL    |                 |
| 69.65    | 14.30    | 4.34           | 2.340                         | 3.25       | 14.48           |          | NHL     |                 |
|          |          |                |                               |            |                 |          |         |                 |

**Table S2.** The indirect tensile strength with and without moisture exposure.

| Gains<br>% | TSR<br>% | ITS <sub>c</sub><br>kPa | ITS <sub>a</sub><br>kPa | HL Type | HL Content<br>% |
|------------|----------|-------------------------|-------------------------|---------|-----------------|
| ---        | 77.5     | 763.2                   | 984.6                   | Control | 0%              |
| 3.2        | 80.1     | 835.0                   | 1041.8                  | r-HL    | 1%              |
| 6.3        | 82.7     | 883.2                   | 1068.7                  | SNHL    |                 |
| 5.7        | 82.2     | 890.8                   | 1083.9                  | NHL     |                 |
| 5.7        | 82.2     | 917.0                   | 1114.9                  | r-HL    |                 |
| 7.8        | 84.1     | 981.8                   | 1168.0                  | SNHL    | 1.5%            |
| 12.2       | 88.3     | 1042.5                  | 1181.1                  | NHL     |                 |
| 15.9       | 92.1     | 890.1                   | 966.0                   | r-HL    |                 |
| 16.8       | 93.2     | 1090.8                  | 1173.5                  | SNHL    |                 |
| 18.5       | 95.1     | 1021.8                  | 1074.9                  | NHL     | 2.0%            |
| 17.2       | 93.6     | 877.7                   | 937.0                   | r-HL    |                 |
| 16.0       | 92.3     | 988.7                   | 1071.4                  | SNHL    |                 |
| 15.8       | 92       | 1022.5                  | 1112.1                  | NHL     |                 |
| 16.6       | 92.9     | 853.6                   | 918.4                   | r-HL    | 2.5%            |
| 15.2       | 92.5     | 1029.4                  | 1105.9                  | SNHL    |                 |
| 14.9       | 91.1     | 1046.6                  | 1149.4                  | NHL     |                 |
|            |          |                         |                         |         |                 |

**Table S3.** Results of the resilient modulus (Mr) tests.

| Mr<br>MPa | HL type | HL Content<br>% |
|-----------|---------|-----------------|
| 1235      | Control | 0%              |
| 1379      | r-HL    | 1%              |
| 1396      | SNHL    |                 |
| 1405      | NHL     |                 |
| 1471      | r-HL    | 1.5%            |
| 1536      | SNHL    |                 |
| 1641      | NHL     |                 |
| 1615      | r-HL    | 2.0%            |
| 1833      | SNHL    |                 |
| 1905      | NHL     |                 |
| 1655      | r-HL    | 2.5%            |
| 1916      | SNHL    |                 |
| 1933      | NHL     |                 |
| 1742      | r-HL    | 3.0%            |
| 2016      | SNHL    |                 |
| 2039      | NHL     |                 |
